# Supplementary material for: A computational and experimental search for polymorphs of parabanic acid – a salutary tale leading to the crystal structure of oxo-ureido-acetic acid methyl esterElectronic supplementary information (ESI) available: crystal structures of the 16 lattice energy minima in Table 2, in the space group setting used in the minimisation. See http://www.rsc.org/suppdata/ce/b2/b211784c/
Source: Royal Society of Chemistry journal article supplement (doi:10.1039/b211784c), 2003-01-14
Supplement: ai25.doc [file ai25.doc]

TITLE PARABANIC ACID AI25 Elatt=-105.09 kJ/mol

SPACEGROUP P21/c

CELL 8.841061 5.460482 9.185884 90.000000 92.152530 90.000000

ATOM N1 0.683833 0.728062 0.862534

ATOM N2 0.847824 1.035111 0.850677

ATOM C1 0.813506 0.826947 0.931951

ATOM C2 0.747454 1.074564 0.733265

ATOM C3 0.633517 0.861069 0.741446

ATOM O1 0.881471 0.749230 1.039356

ATOM O2 0.747918 1.238613 0.643916

ATOM O3 0.525064 0.820567 0.659833

ATOM H1 0.638931 0.589910 0.895245

ATOM H2 0.928517 1.132241 0.874361

END
