# Supplementary material for: A computational and experimental search for polymorphs of parabanic acid – a salutary tale leading to the crystal structure of oxo-ureido-acetic acid methyl esterElectronic supplementary information (ESI) available: crystal structures of the 16 lattice energy minima in Table 2, in the space group setting used in the minimisation. See http://www.rsc.org/suppdata/ce/b2/b211784c/
Source: Royal Society of Chemistry journal article supplement (doi:10.1039/b211784c), 2003-01-14
Supplement: aq17.doc [file aq17.doc]

TITLE PARABANIC ACID AQ17 Elatt=-105.32 kJ/mol

SPACEGROUP P212121

CELL 8.440153 9.806850 5.145882 90.000000 90.000000 90.000000

ATOM N1 0.764091 0.671372 0.631277

ATOM N2 0.836718 0.888755 0.656106

ATOM C1 0.750187 0.796859 0.503967

ATOM C2 0.904984 0.829032 0.873406

ATOM C3 0.854420 0.677957 0.856246

ATOM O1 0.678684 0.820858 0.304803

ATOM O2 0.986079 0.882264 1.040021

ATOM O3 0.886949 0.586617 1.006622

ATOM H1 0.717394 0.594428 0.569533

ATOM H2 0.845722 0.978338 0.613263

END
