# Supplementary material for: A computational and experimental search for polymorphs of parabanic acid – a salutary tale leading to the crystal structure of oxo-ureido-acetic acid methyl esterElectronic supplementary information (ESI) available: crystal structures of the 16 lattice energy minima in Table 2, in the space group setting used in the minimisation. See http://www.rsc.org/suppdata/ce/b2/b211784c/
Source: Royal Society of Chemistry journal article supplement (doi:10.1039/b211784c), 2003-01-14
Supplement: az17.doc [file az17.doc]

TITLE PARABANIC ACID AZ17 Elatt=-106.42 kJ/mol

SPACEGROUP P212121

CELL 16.253080 5.352922 4.975070 90.000000 90.000000 90.000000

ATOM N1 0.166065 0.183464 0.525091

ATOM N2 0.079939 0.505679 0.535620

ATOM C1 0.099967 0.291757 0.387700

ATOM C2 0.129483 0.539921 0.759729

ATOM C3 0.189315 0.315887 0.752519

ATOM O1 0.067122 0.216689 0.184354

ATOM O2 0.126968 0.706927 0.924932

ATOM O3 0.244004 0.268272 0.911015

ATOM H1 0.190400 0.040202 0.467725

ATOM H2 0.038313 0.609308 0.486213

ATOM N1 0.666065 0.316536 0.474909

ATOM N2 0.579939 -0.005679 0.464380

ATOM C1 0.599967 0.208243 0.612300

ATOM C2 0.629483 -0.039921 0.240271

ATOM C3 0.689315 0.184113 0.247481

ATOM O1 0.567122 0.283311 0.815646

ATOM O2 0.626968 -0.206927 0.075068

ATOM O3 0.744004 0.231728 0.088985

ATOM H1 0.690400 0.459798 0.532275

ATOM H2 0.538313 -0.109308 0.513787

ATOM N1 0.833935 0.683464 0.974909

ATOM N2 0.920061 1.005679 0.964380

ATOM C1 0.900033 0.791757 1.112300

ATOM C2 0.870517 1.039921 0.740271

ATOM C3 0.810685 0.815887 0.747481

ATOM O1 0.932878 0.716689 1.315646

ATOM O2 0.873032 1.206927 0.575068

ATOM O3 0.755996 0.768272 0.588985

ATOM H1 0.809600 0.540202 1.032275

ATOM H2 0.961687 1.109308 1.013787

ATOM N1 0.333935 0.816536 0.025091

ATOM N2 0.420061 0.494321 0.035620

ATOM C1 0.400033 0.708243 -0.112300

ATOM C2 0.370517 0.460079 0.259729

ATOM C3 0.310685 0.684113 0.252519

ATOM O1 0.432878 0.783311 -0.315646

ATOM O2 0.373032 0.293073 0.424932

ATOM O3 0.255996 0.731728 0.411015

ATOM H1 0.309600 0.959798 -0.032275

ATOM H2 0.461687 0.390692 -0.013787

END

END
