# Supplementary material for: A computational and experimental search for polymorphs of parabanic acid – a salutary tale leading to the crystal structure of oxo-ureido-acetic acid methyl esterElectronic supplementary information (ESI) available: crystal structures of the 16 lattice energy minima in Table 2, in the space group setting used in the minimisation. See http://www.rsc.org/suppdata/ce/b2/b211784c/
Source: Royal Society of Chemistry journal article supplement (doi:10.1039/b211784c), 2003-01-14
Supplement: bb31.doc [file bb31.doc]

TITLE PARABANIC ACID BB31 Elatt=-105.75 kJ/mol

SPACEGROUP P212121

CELL 16.243928 4.979989 5.356727 89.999990 90.000000 90.000000

ATOM N1 0.919071 0.036274 0.752957

ATOM N2 0.832332 0.027906 0.432344

ATOM C1 0.898489 -0.110649 0.539286

ATOM C2 0.809521 0.254780 0.565816

ATOM C3 0.869774 0.260524 0.788736

ATOM O1 0.930931 -0.313966 0.463065

ATOM O2 0.754860 0.413822 0.519733

ATOM O3 0.872731 0.424845 0.956193

ATOM H1 0.960809 -0.014071 0.855847

ATOM H2 0.807645 -0.028803 0.289560

END
