# Supplementary material for: A computational and experimental search for polymorphs of parabanic acid – a salutary tale leading to the crystal structure of oxo-ureido-acetic acid methyl esterElectronic supplementary information (ESI) available: crystal structures of the 16 lattice energy minima in Table 2, in the space group setting used in the minimisation. See http://www.rsc.org/suppdata/ce/b2/b211784c/
Source: Royal Society of Chemistry journal article supplement (doi:10.1039/b211784c), 2003-01-14
Supplement: de5.doc [file de5.doc]

TITLE PARABANIC ACID DE5 Elatt=-105.82 kJ/mol

SPACEGROUP C2/c

CELL 20.106881 5.187759 16.727560 90.000000 31.043934 90.000000

ATOM N1 0.092553 1.080689 -0.006061

ATOM N2 0.253275 1.022136 -0.085616

ATOM C1 0.150336 1.186762 0.002472

ATOM C2 0.264373 0.816927 -0.149788

ATOM C3 0.152616 0.857503 -0.094421

ATOM O1 0.118267 1.379690 0.071243

ATOM O2 0.343397 0.644015 -0.231030

ATOM O3 0.124564 0.723273 -0.122479

ATOM H1 0.022512 1.153766 0.042583

ATOM H2 0.306375 1.050441 -0.097983

END
