# Supplementary material for: A computational and experimental search for polymorphs of parabanic acid – a salutary tale leading to the crystal structure of oxo-ureido-acetic acid methyl esterElectronic supplementary information (ESI) available: crystal structures of the 16 lattice energy minima in Table 2, in the space group setting used in the minimisation. See http://www.rsc.org/suppdata/ce/b2/b211784c/
Source: Royal Society of Chemistry journal article supplement (doi:10.1039/b211784c), 2003-01-14
Supplement: fc5.doc [file fc5.doc]

TITLE PARABANIC ACID FC5 Elatt=-108.95 kJ/mol

SPACEGROUP P1

CELL 5.168643 5.031636 17.329518 90.000000 68.184560 90.000000

ATOM N1 0.839876 0.278814 0.839524

ATOM N2 1.083646 0.242674 0.921006

ATOM C1 0.886002 0.401970 0.905650

ATOM C2 1.166068 0.024762 0.868454

ATOM C3 0.996514 0.049758 0.811844

ATOM O1 0.778231 0.603254 0.941836

ATOM O2 1.333029 -0.147357 0.866747

ATOM O3 1.000903 -0.098592 0.756034

ATOM H1 0.718010 0.345478 0.817863

ATOM H2 1.148636 0.281742 0.961738

ATOM N1 0.160124 0.721186 0.160476

ATOM N2 -0.083646 0.757326 0.078994

ATOM C1 0.113998 0.598030 0.094350

ATOM C2 -0.166068 0.975238 0.131546

ATOM C3 0.003486 0.950242 0.188156

ATOM O1 0.221769 0.396746 0.058164

ATOM O2 -0.333029 1.147357 0.133253

ATOM O3 -0.000903 1.098592 0.243966

ATOM H1 0.281990 0.654522 0.182137

ATOM H2 -0.148636 0.718258 0.038262

ATOM N1 0.660124 0.778814 0.660476

ATOM N2 0.416354 0.742674 0.578994

ATOM C1 0.613998 0.901970 0.594350

ATOM C2 0.333932 0.524762 0.631546

ATOM C3 0.503486 0.549758 0.688156

ATOM O1 0.721769 1.103254 0.558164

ATOM O2 0.166971 0.352643 0.633253

ATOM O3 0.499097 0.401408 0.743966

ATOM H1 0.781990 0.845478 0.682137

ATOM H2 0.351364 0.781742 0.538262

ATOM N1 0.339876 0.221186 0.339524

ATOM N2 0.583646 0.257326 0.421006

ATOM C1 0.386002 0.098030 0.405650

ATOM C2 0.666068 0.475238 0.368454

ATOM C3 0.496514 0.450242 0.311844

ATOM O1 0.278231 -0.103254 0.441836

ATOM O2 0.833029 0.647357 0.366747

ATOM O3 0.500903 0.598592 0.256034

ATOM H1 0.218010 0.154522 0.317863

ATOM H2 0.648636 0.218258 0.461738

END
